# Supplementary material
Source: PubMed Central journal article supplement (PMC4098717)

Supplemental Figure 1

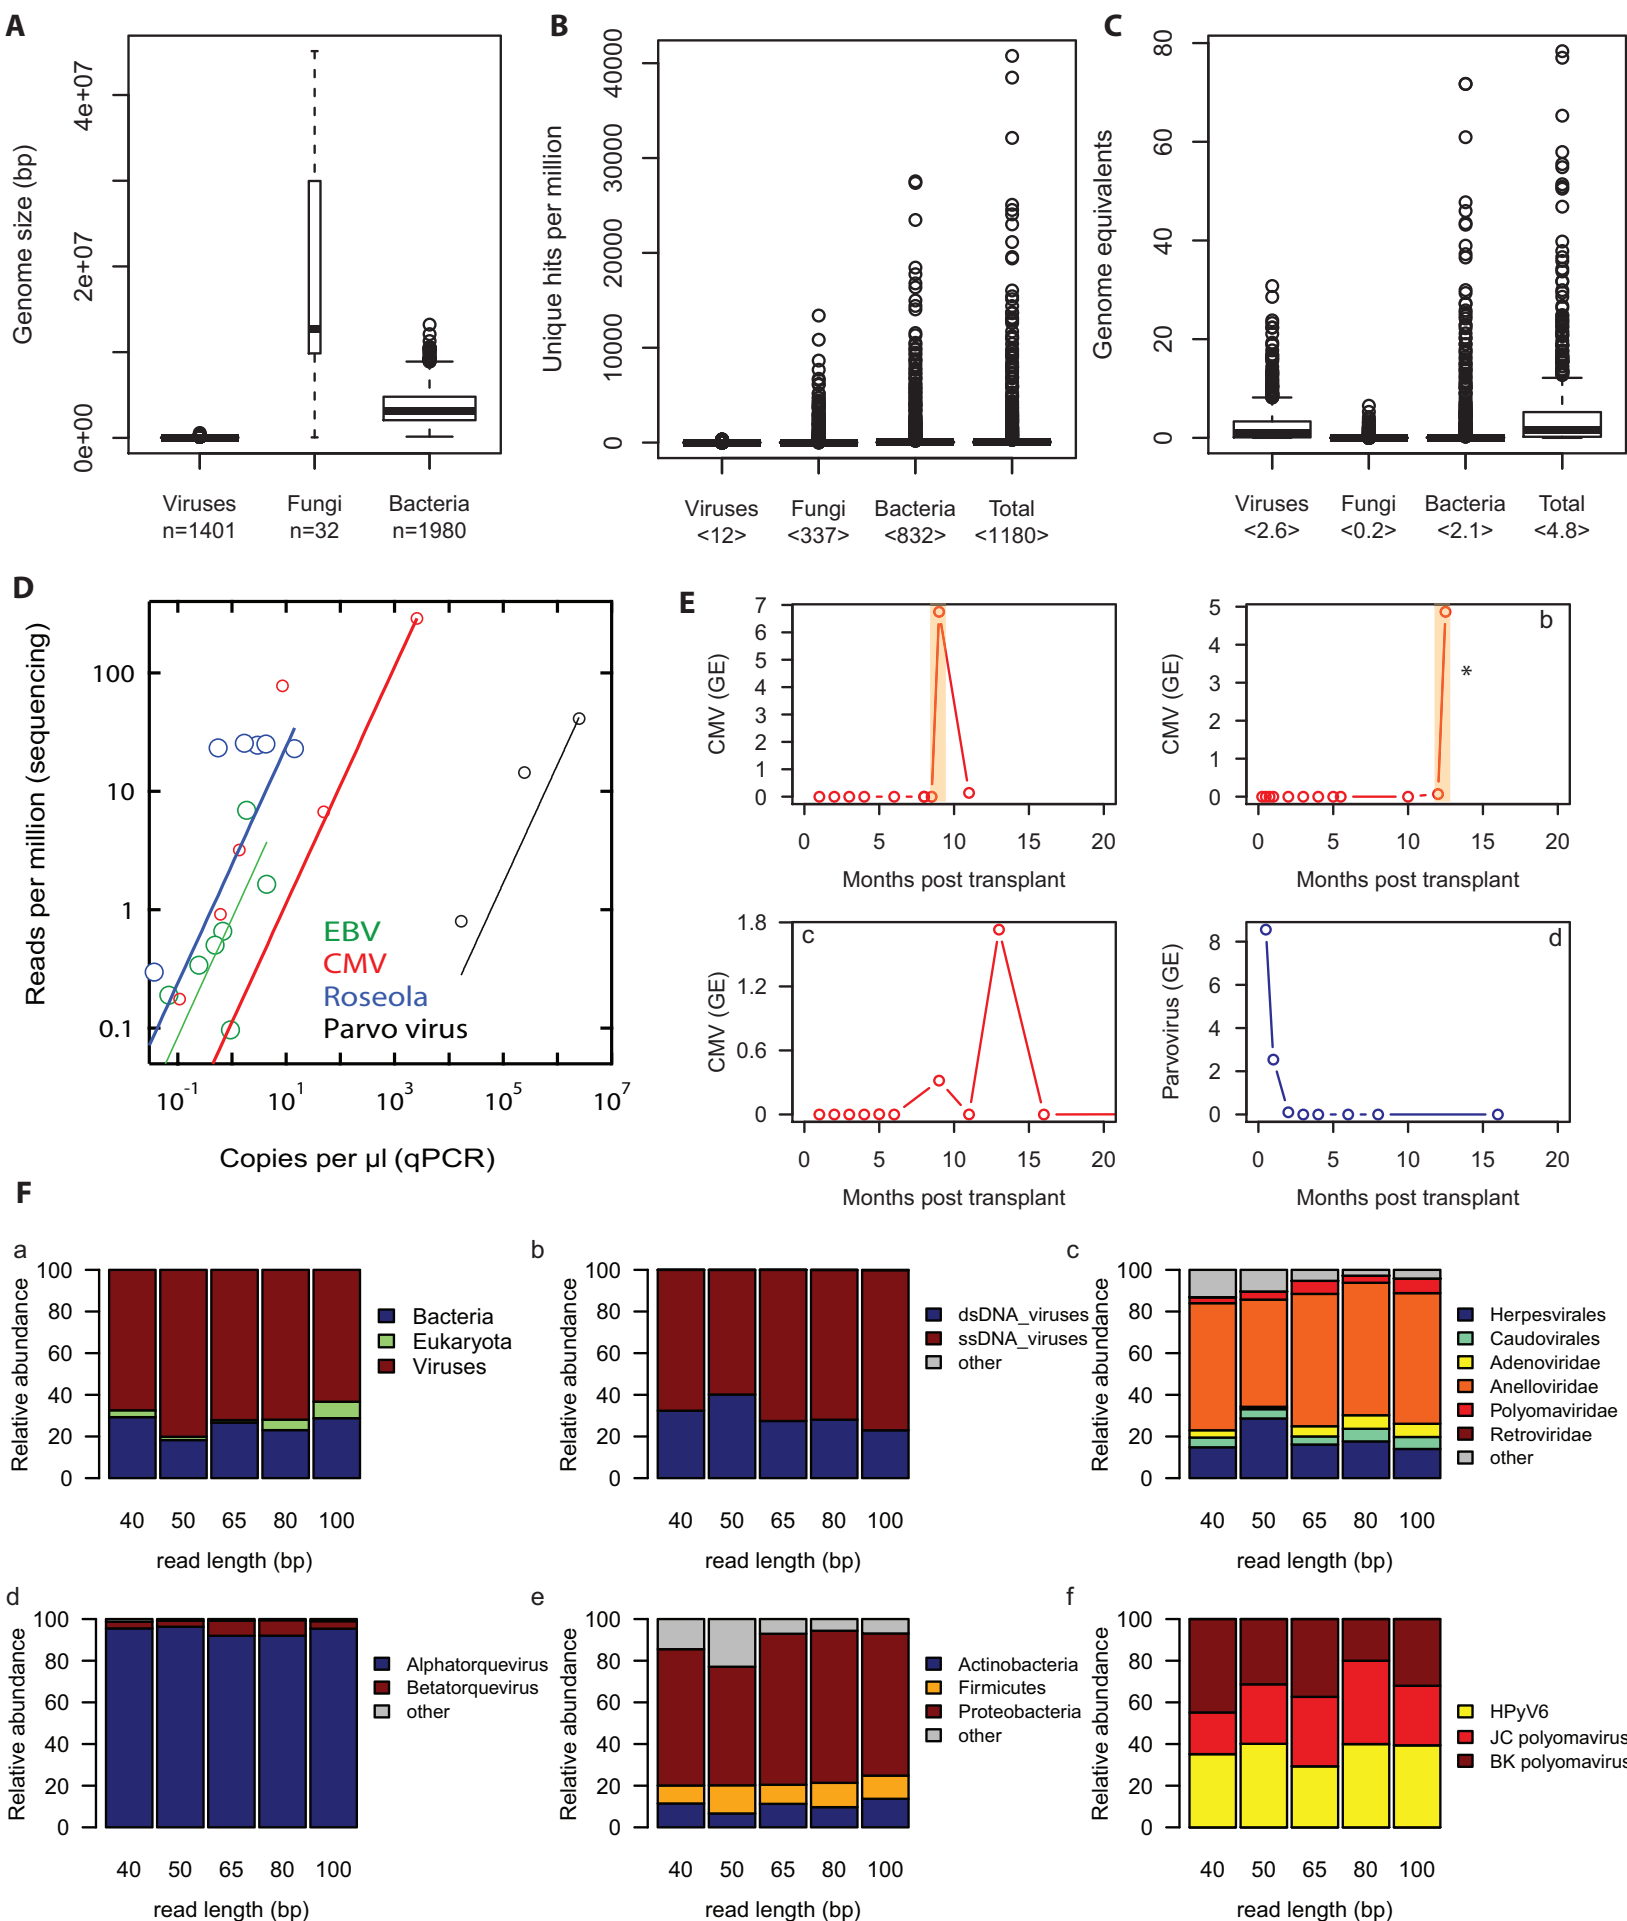

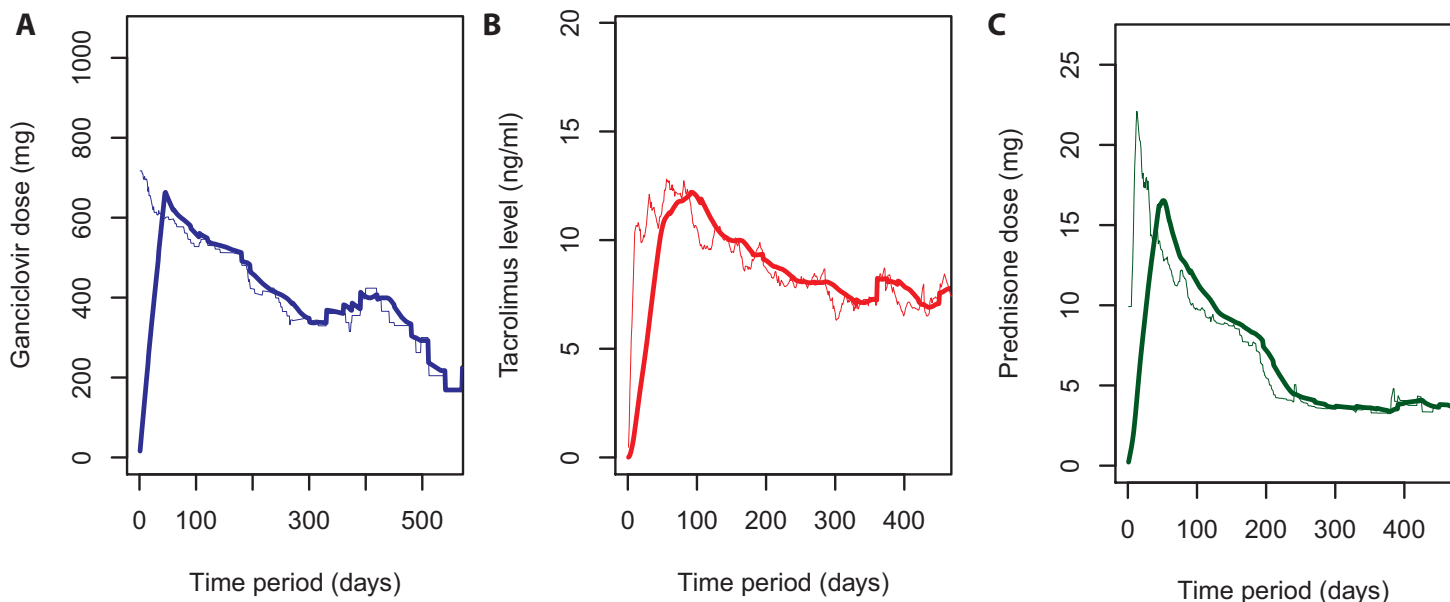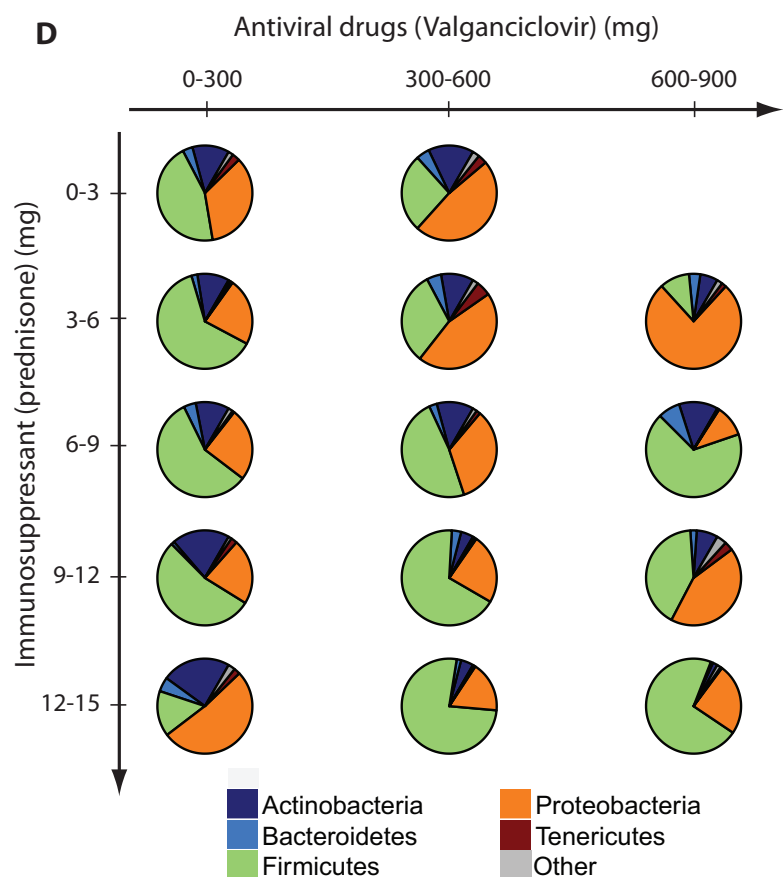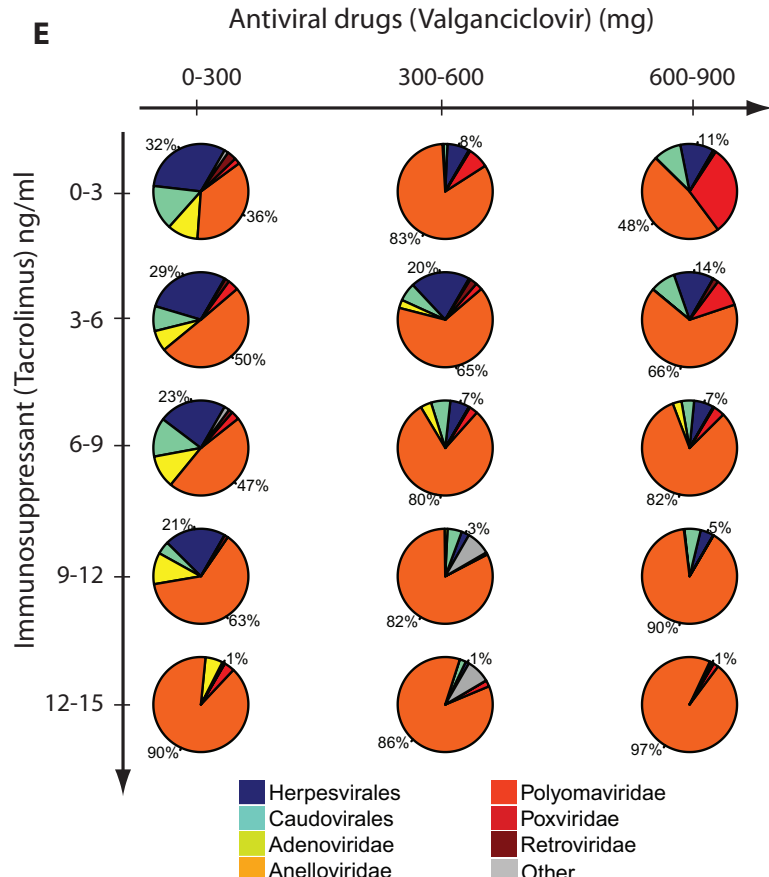

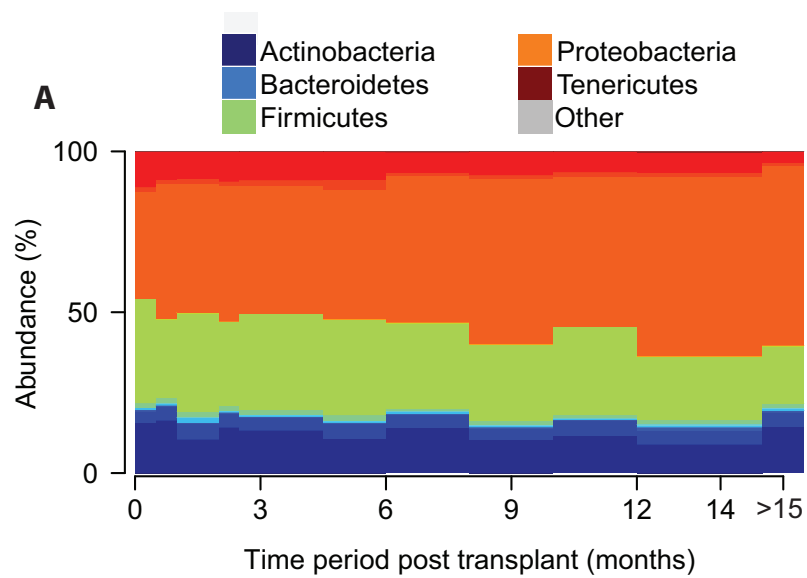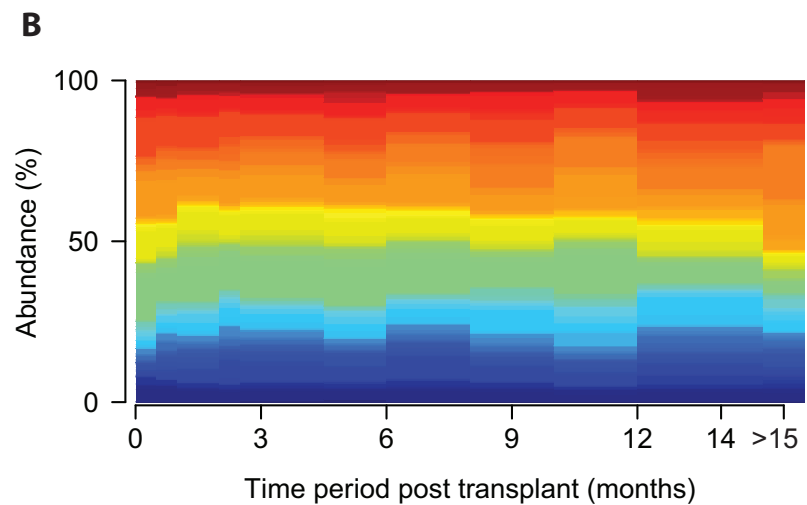

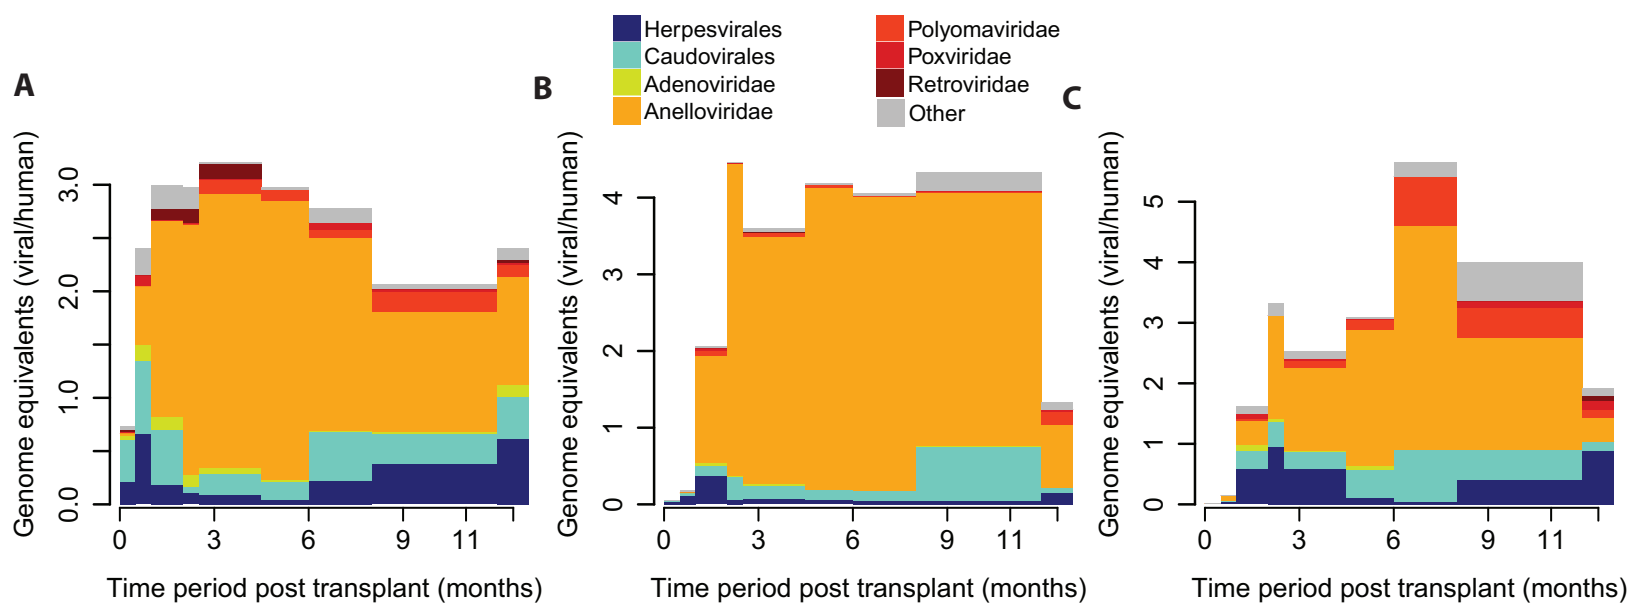

Supplement: NIHMS536121-supplement-02.pdf [file NIHMS536121-supplement-02.pdf]
